# Supplementary material
Source: PubMed Central journal article supplement (PMC3774655)

Channel involvement results of the automatic detector of scalp fast oscillations. Every dot corresponds to a bipolar channel on the scalp. The color scale indicates the proportion of events in that particular channel. Left: distribution of expert marks. Center and right: distribution of detections of automatic detector at operating points S95 and S85 respectively. The total number of events is given below each diagram, as well as the ranking distance (RD) value for the automatic detector. Results for 15 focal epilepsy patients.

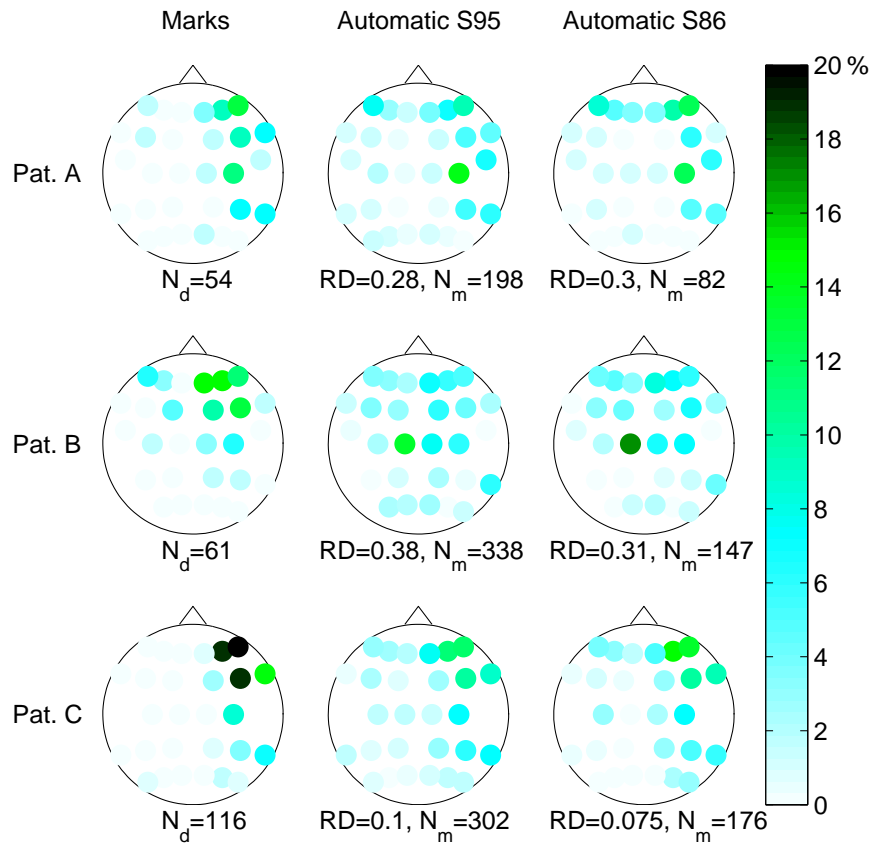

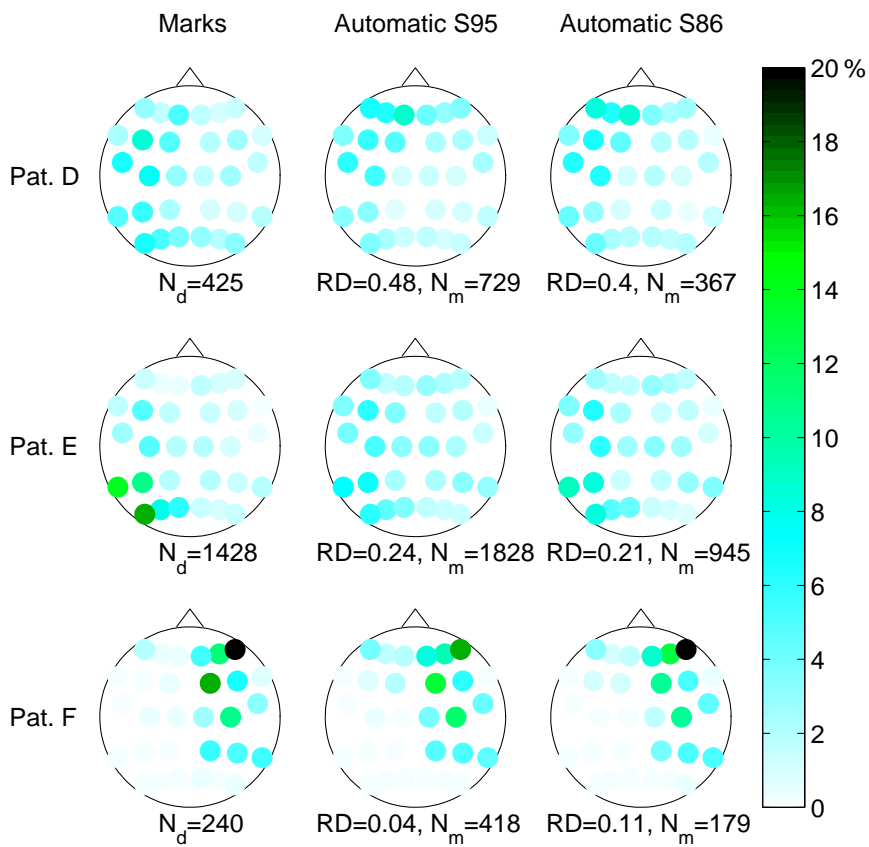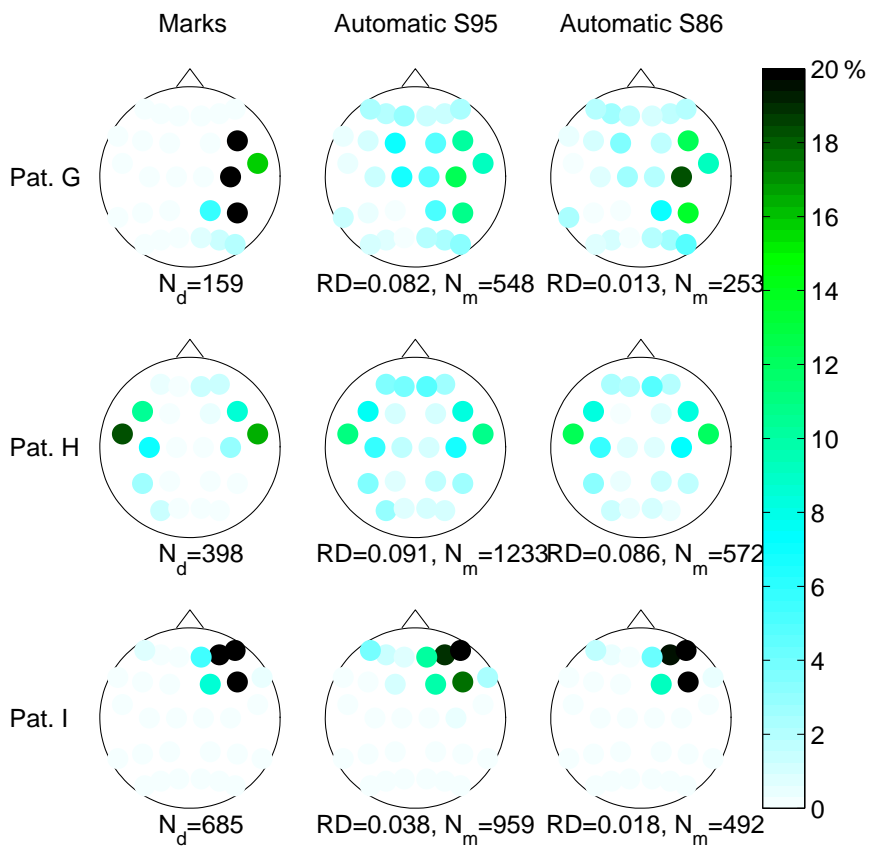

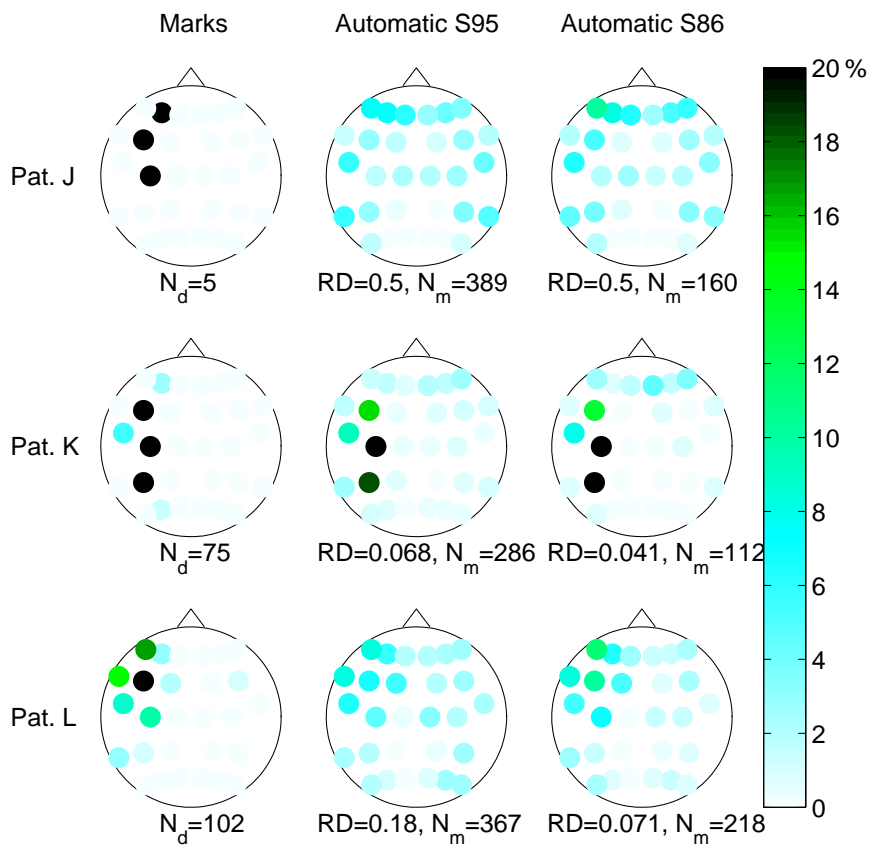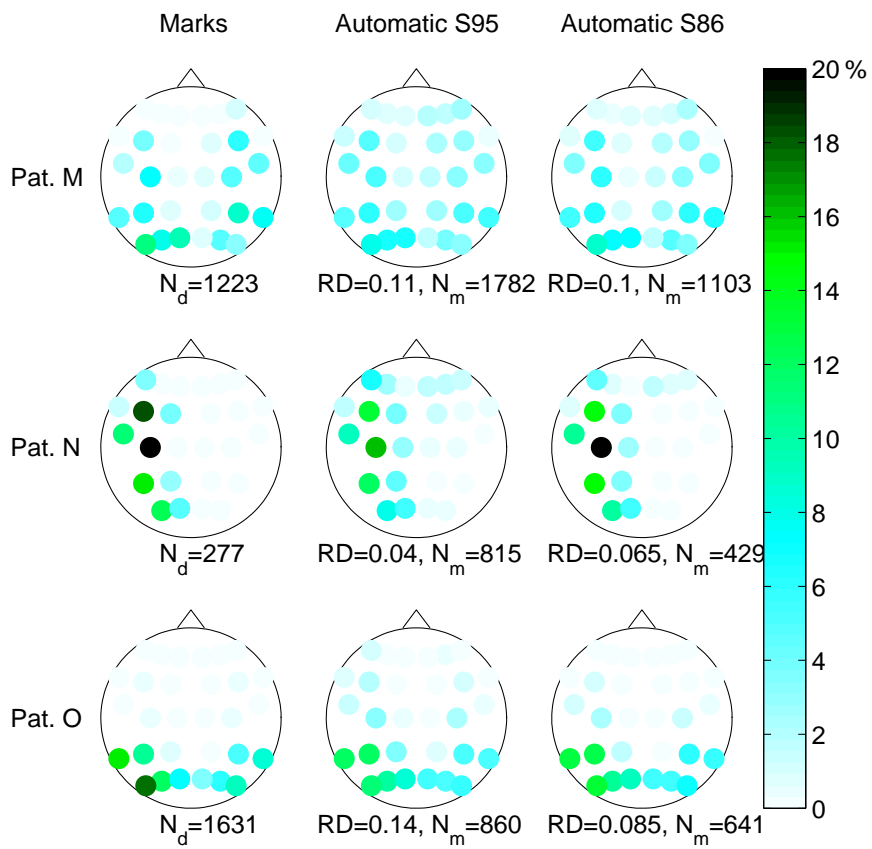

Supplement: NIHMS3337-supplement-S1.pdf [file NIHMS3337-supplement-S1.pdf]
