# Supplementary material
Source: PubMed Central journal article supplement (PMC3774655)
Supplement: NIHMS3337-supplement-S2.pdf [file NIHMS3337-supplement-S2.pdf]

Performance curves (Sensitivity vs. Positive Predicted and Sensitivity vs. Positive Agreement) of the automatic detector of fast oscillations for different parameter values of the detection stage.

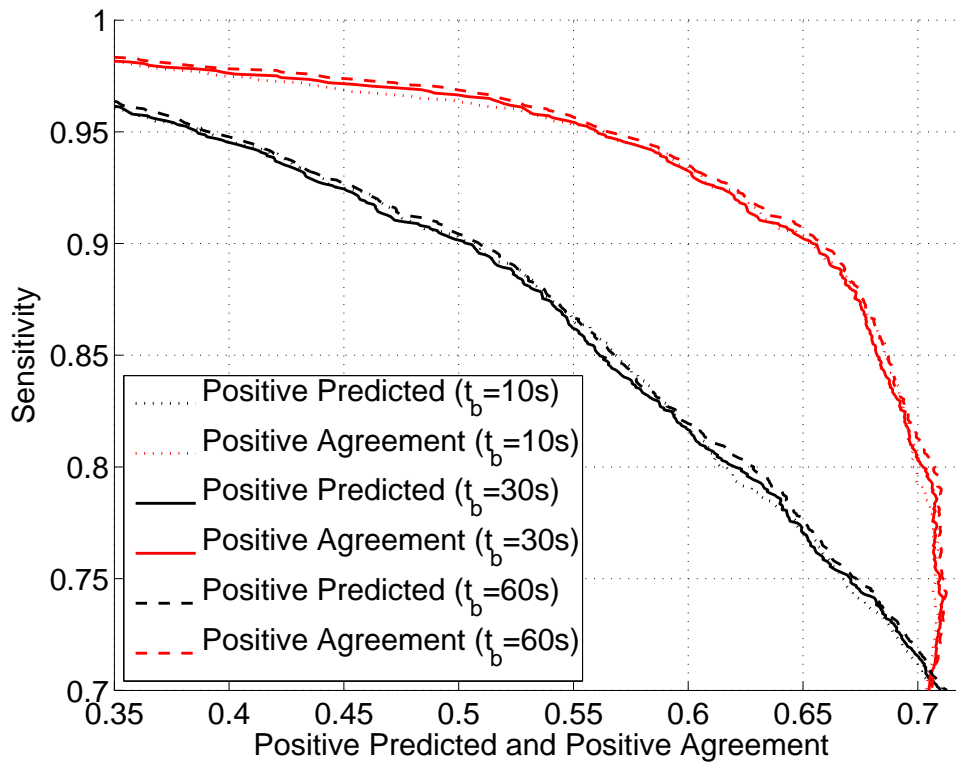

Performance for different lengths of the moving window  $t_b$  used to compute the background level. The other parameters are set at  $c = 2.5$  and  $t_{sep} = 50ms$ .

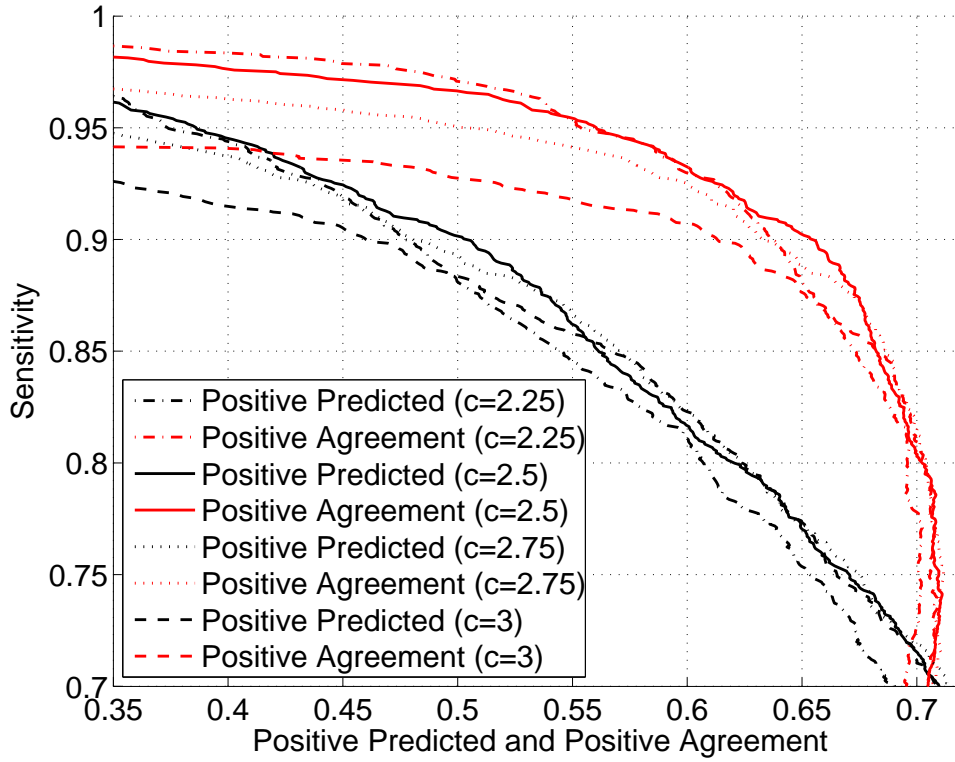

Performance for different values of the proportionality constant  $c$  used to compute the threshold based on the background level. The other parameters are set at  $t_b = 30s$  and  $t_{sep} = 50ms$ .

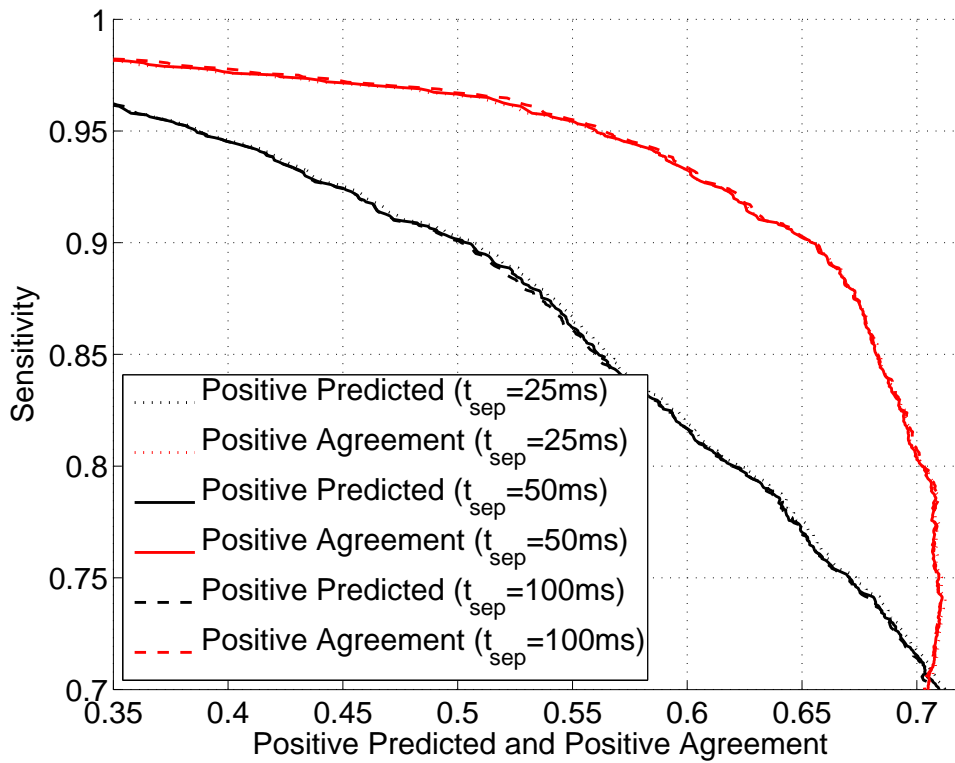

Performance for different values of the minimum separation between different events  $t_{sep}$ . The other parameters are set at  $c = 2.5$  and  $t_b = 30s$ .
